# Supplementary material for: Synthesis, crystal structure, solution and spectroscopic properties, and hydrogen-evolving activity of [K(18-crown-6)][Pt(ii)(2-phenylpyridinato)Cl2]
Source: Royal Society of Chemistry journal article supplement (doi:10.1039/b814939a), 2009-01-12
Supplement: b814939a.pdf [file b814939a.pdf]

## Supporting Information

### **Synthesis, Crystal Structure, Solution and Spectroscopic Properties, and Hydrogen-Evolving Activity of [K(18-Crown-6)][Pt(II)(2-phenylpyridinato)Cl<sub>2</sub>]**

Masayuki Kobayashi, Shigeyuki Masaoka, and Ken Sakai\*

Department of Chemistry, Faculty of Science, Kyushu University, Hakozaki 6-10-1, Higashi-ku,  
Fukuoka 812-8581, Japan

E-mail: ksakai@chem.kyushu-univ.jp

**Table S1.** Cartesian coordinates of a fully optimized structure of [Pt(ppy)Cl<sub>2</sub>]<sup>-</sup> in water. The structure was optimized using the B3LYP level of DFT and the LanL2DZ basis set using the PCM method (water) in Gaussian 03.

| Atom | X         | Y         | Z         |
|------|-----------|-----------|-----------|
| Pt1  | -0.818631 | -0.091014 | -0.000284 |
| Cl2  | -2.804487 | 1.582869  | 0.004778  |
| Cl3  | -2.458425 | -1.923135 | -0.003948 |
| C4   | 0.795402  | -1.275555 | 0.000059  |
| N5   | 0.624662  | 1.349478  | 0.000053  |
| C6   | 0.832280  | -2.689760 | 0.000770  |
| C7   | 2.042805  | -0.572910 | 0.000493  |
| C8   | 0.371501  | 2.689289  | -0.000738 |
| C9   | 1.930768  | 0.888513  | -0.000127 |
| C10  | 3.274478  | -1.267621 | 0.001478  |
| C11  | 2.063693  | -3.379357 | 0.001953  |
| C12  | 2.999333  | 1.807348  | -0.001111 |
| C13  | 1.404091  | 3.634050  | -0.001873 |
| H14  | -0.673485 | 2.975558  | -0.000517 |
| H15  | -0.095833 | -3.253966 | 0.000535  |
| C16  | 3.286802  | -2.672371 | 0.002310  |
| C17  | 2.740739  | 3.186026  | -0.002065 |
| H18  | 1.158640  | 4.693945  | -0.002593 |
| H19  | 4.023907  | 1.442696  | -0.001336 |
| H20  | 4.219582  | -0.724151 | 0.001875  |
| H21  | 2.068541  | -4.470184 | 0.002597  |
| H22  | 3.564075  | 3.899217  | -0.003035 |
| H23  | 4.233348  | -3.211757 | 0.003285  |

E(RB+HF-LYP) = -628.039926164 Hartree

**Table S2.** Cartesian coordinates of a fully optimized structure of Pt(ppy)Cl(OH<sub>2</sub>) (**2**) in water. The structure was optimized using the B3LYP level of DFT and the LanL2DZ basis set using the PCM method (water) in Gaussian 03.

| Atom | X         | Y         | Z         |
|------|-----------|-----------|-----------|
| Pt1  | -0.831680 | -0.389162 | -0.000306 |
| C2   | 0.059142  | 1.392014  | -0.002499 |
| C3   | 1.636428  | 3.768457  | 0.005492  |
| C4   | 1.490277  | 1.333791  | 0.003027  |
| C5   | -0.555920 | 2.664212  | -0.004478 |
| C6   | 0.225926  | 3.839964  | -0.000662 |
| C7   | 2.268659  | 2.513123  | 0.007220  |
| N8   | 1.094565  | -1.017302 | -0.003096 |
| C9   | 3.797256  | -1.719732 | -0.002762 |
| C10  | 1.455450  | -2.330719 | -0.010295 |
| C11  | 2.053756  | -0.021032 | 0.001763  |
| C12  | 3.418840  | -0.368144 | 0.002559  |
| C13  | 2.800614  | -2.717554 | -0.009987 |
| Cl14 | -3.158210 | 0.376042  | -0.005433 |
| H15  | 0.644594  | -3.050427 | -0.017885 |
| H16  | 3.054112  | -3.775470 | -0.015584 |
| H17  | 4.851733  | -1.993152 | -0.002079 |
| H18  | 4.175508  | 0.413113  | 0.006783  |
| H19  | 3.357723  | 2.460611  | 0.011645  |
| H20  | 2.231962  | 4.680701  | 0.008771  |
| H21  | -0.266933 | 4.812906  | -0.002163 |
| H22  | -1.639858 | 2.742234  | -0.008439 |
| O23  | -1.640871 | -2.481271 | 0.011733  |
| H24  | -2.043691 | -2.773956 | 0.867580  |
| H25  | -2.242085 | -2.709614 | -0.740861 |

E(RB+HF-LYP) = -689.341595451 Hartree

**Table S3.** Cartesian coordinates of a fully optimized structure of Pt(ppy)Cl(OH<sub>2</sub>) (**3**) in water. The structure was optimized using the B3LYP level of DFT and the LanL2DZ basis set using the PCM method (water) in Gaussian 03.

| Atom | X         | Y         | Z         |
|------|-----------|-----------|-----------|
| Pt1  | -0.776888 | -0.481419 | -0.000025 |
| N2   | 0.017682  | 1.372418  | -0.000258 |
| C3   | 1.152909  | -0.985358 | -0.000232 |
| Cl4  | -3.272917 | 0.182515  | -0.000878 |
| O5   | -1.458745 | -2.487013 | 0.001044  |
| C6   | 1.402615  | 1.437013  | -0.000646 |
| C7   | -0.726502 | 2.514251  | 0.000613  |
| C8   | 1.686914  | -2.291723 | 0.000907  |
| C9   | 2.054141  | 0.123268  | -0.000668 |
| H10  | -1.936730 | -2.782403 | 0.816904  |
| H11  | -1.935303 | -2.784362 | -0.815004 |
| C12  | -0.127671 | 3.779130  | 0.001009  |
| C13  | 2.042480  | 2.691289  | -0.000013 |
| C14  | 3.452751  | -0.077765 | -0.001171 |
| C15  | 3.085202  | -2.489179 | 0.000601  |
| H16  | 1.019890  | -3.150645 | 0.002441  |
| H17  | -1.802506 | 2.383672  | 0.000685  |
| C18  | 1.279185  | 3.868761  | 0.000725  |
| C19  | 3.968360  | -1.385992 | -0.000561 |
| H20  | 3.486074  | -3.503487 | 0.001557  |
| H21  | 4.138629  | 0.769929  | -0.001728 |
| H22  | 3.129074  | 2.741456  | -0.000095 |
| H23  | -0.755215 | 4.667684  | 0.001623  |
| H24  | 5.045742  | -1.547662 | -0.000554 |
| H25  | 1.771050  | 4.840731  | 0.001149  |

E(RB+HF-LYP) = -689.338549926 Hartree

**Table S4.** Cartesian coordinates of a fully optimized structure of Pt<sub>2</sub>(ppy)<sub>2</sub>(μ-Cl)<sub>2</sub> (**4**) in water. The structure was optimized using the B3LYP level of DFT and the LanL2DZ basis set using the PCM method (water) in Gaussian 03.

| Atom | X        | Y         | Z         | Atom | X         | Y         | Z         |
|------|----------|-----------|-----------|------|-----------|-----------|-----------|
| C1   | 3.477479 | -1.309177 | 0.010551  | Pt23 | -1.951936 | 0.024886  | -0.019448 |
| C2   | 5.847110 | -2.878750 | 0.033221  | Cl24 | -0.101600 | 1.683736  | -0.030753 |
| C3   | 4.766544 | -0.693219 | 0.020108  | C25  | -3.474514 | 1.309334  | 0.003869  |
| C4   | 3.397637 | -2.717509 | 0.011438  | C26  | -5.840141 | 2.884507  | 0.039664  |
| C5   | 4.576626 | -3.494979 | 0.023250  | C27  | -3.391295 | 2.717476  | 0.007586  |
| C6   | 5.942211 | -1.476492 | 0.031418  | C28  | -4.764831 | 0.696269  | 0.021592  |
| H7   | 2.431596 | -3.215521 | 0.003291  | C29  | -5.938522 | 1.482515  | 0.038564  |
| H8   | 4.501394 | -4.582888 | 0.024163  | C30  | -4.568270 | 3.497719  | 0.024750  |
| H9   | 6.924844 | -1.004246 | 0.039723  | H31  | -2.424085 | 3.213267  | -0.003701 |
| H10  | 6.750492 | -3.487450 | 0.042661  | H32  | -6.922204 | 1.012527  | 0.050706  |
| N11  | 3.472124 | 1.308161  | 0.009428  | H33  | -4.490324 | 4.585461  | 0.026503  |
| C12  | 5.683686 | 3.018281  | 0.025477  | H34  | -6.741994 | 3.495392  | 0.053088  |
| C13  | 3.290981 | 2.658685  | 0.008576  | N35  | -3.474764 | -1.307641 | -0.002136 |
| C14  | 4.747784 | 0.771666  | 0.018803  | C36  | -5.689186 | -3.013704 | 0.042382  |
| C15  | 5.865946 | 1.627239  | 0.027525  | C37  | -4.749280 | -0.768641 | 0.020643  |
| C16  | 4.375120 | 3.543036  | 0.016060  | C38  | -3.296119 | -2.658494 | -0.002346 |
| H17  | 2.268174 | 3.017803  | 0.000050  | C39  | -4.381639 | -3.540911 | 0.019866  |
| H18  | 6.868240 | 1.204881  | 0.035123  | C40  | -5.868836 | -1.622311 | 0.042318  |
| H19  | 4.190475 | 4.615029  | 0.013342  | H41  | -2.274141 | -3.019612 | -0.017673 |
| H20  | 6.545599 | 3.684360  | 0.031118  | H42  | -4.198959 | -4.613253 | 0.020287  |
| Pt21 | 1.951600 | -0.026935 | -0.008844 | H43  | -6.870136 | -1.197923 | 0.061233  |
| Cl22 | 0.100826 | -1.687773 | -0.039650 | H44  | -6.552117 | -3.678219 | 0.060775  |

E(RB+HF-LYP) = -1225.79278314 Hartree

**Table S5.** Cartesian coordinates of a fully optimized structure of [Pt(ppy)Cl(OH)]<sup>-</sup> (**5**) in water. The structure was optimized using the B3LYP level of DFT and the LanL2DZ basis set using the PCM method (water) in Gaussian 03.

| Atom | X         | Y         | Z         |
|------|-----------|-----------|-----------|
| Pt1  | -0.831882 | -0.452360 | -0.000229 |
| C2   | -0.015298 | 1.389547  | 0.000741  |
| C3   | 1.505099  | 3.826203  | -0.001187 |
| C4   | 1.423312  | 1.387110  | 0.000316  |
| C5   | -0.654153 | 2.657224  | 0.000189  |
| C6   | 0.090518  | 3.855066  | -0.000776 |
| C7   | 2.170369  | 2.588713  | -0.000570 |
| N8   | 1.113691  | -0.980937 | -0.000945 |
| C9   | 3.835696  | -1.589343 | 0.001734  |
| C10  | 1.516328  | -2.282095 | -0.001165 |
| C11  | 2.034305  | 0.052514  | 0.000243  |
| C12  | 3.412343  | -0.251675 | 0.001675  |
| C13  | 2.873398  | -2.622644 | 0.000182  |
| Cl14 | -3.201807 | 0.211736  | 0.001952  |
| H15  | 0.710830  | -3.010676 | -0.002187 |
| H16  | 3.165236  | -3.670725 | 0.000138  |
| H17  | 4.899052  | -1.826377 | 0.003167  |
| H18  | 4.142730  | 0.554276  | 0.002950  |
| H19  | 3.260857  | 2.567023  | -0.001096 |
| H20  | 2.074072  | 4.755428  | -0.002010 |
| H21  | -0.429404 | 4.814461  | -0.001316 |
| H22  | -1.741447 | 2.707088  | 0.000357  |
| O23  | -1.414064 | -2.480728 | -0.001758 |
| H24  | -2.399232 | -2.557289 | -0.002912 |

E(RB+HF-LYP) = -688.863379892 Hartree

**Table S6.** Cartesian coordinates of a fully optimized structure of [Pt(ppy)Cl(OH)]<sup>-</sup> (**6**) in water. The structure was optimized using the B3LYP level of DFT and the LanL2DZ basis set using the PCM method (water) in Gaussian 03.

| Atom | X         | Y         | Z         |
|------|-----------|-----------|-----------|
| Pt1  | 0.777260  | -0.537513 | -0.001233 |
| N2   | 0.033605  | 1.371361  | 0.000568  |
| C3   | -1.163995 | -0.964511 | 0.001387  |
| Cl4  | 3.301727  | 0.074937  | 0.006040  |
| O5   | 1.316880  | -2.499515 | -0.006603 |
| C6   | -1.350298 | 1.470829  | 0.000466  |
| C7   | 0.793778  | 2.504232  | 0.000332  |
| C8   | -1.741674 | -2.254698 | 0.001562  |
| C9   | -2.034587 | 0.171714  | 0.001856  |
| H10  | 2.305032  | -2.551479 | -0.005034 |
| C11  | 0.222120  | 3.782071  | -0.001226 |
| C12  | -1.967332 | 2.737996  | -0.001357 |
| C13  | -3.439852 | 0.008478  | 0.002389  |
| C14  | -3.143160 | -2.413092 | 0.002068  |
| H15  | -1.086986 | -3.123373 | 0.001004  |
| H16  | 1.867742  | 2.354344  | 0.001234  |
| C17  | -1.183462 | 3.901961  | -0.002289 |
| C18  | -3.994479 | -1.283186 | 0.002427  |
| H19  | -3.574932 | -3.414969 | 0.001692  |
| H20  | -4.101244 | 0.875550  | 0.002472  |
| H21  | -3.052828 | 2.809179  | -0.002057 |
| H22  | 0.867526  | 4.658014  | -0.001240 |
| H23  | -5.076404 | -1.412663 | 0.002680  |
| H24  | -1.656140 | 4.883290  | -0.004132 |

E(RB+HF-LYP) = -688.872273756 Hartree

**Table S7.** Cartesian coordinates of a fully optimized structure of  $[\text{Pt}(\text{ppy})(\text{OH}_2)_2]^+$  (**7**) in water. The structure was optimized using the B3LYP level of DFT and the LanL2DZ basis set using the PCM method (water) in Gaussian 03.

| Atom | X         | Y         | Z         |
|------|-----------|-----------|-----------|
| Pt1  | -0.978996 | -0.309122 | -0.000369 |
| C2   | 0.824859  | -1.140893 | -0.001335 |
| C3   | 3.527576  | -2.020505 | -0.001238 |
| C4   | 1.904004  | -0.203444 | 0.000661  |
| C5   | 1.123969  | -2.519095 | -0.004130 |
| C6   | 2.467985  | -2.954411 | -0.003813 |
| C7   | 3.246122  | -0.642417 | 0.000795  |
| N8   | 0.115670  | 1.375107  | -0.000375 |
| C9   | 1.770324  | 3.621687  | 0.001865  |
| C10  | -0.432879 | 2.621385  | -0.000681 |
| C11  | 1.489568  | 1.204340  | 0.001159  |
| C12  | 2.329234  | 2.333756  | 0.002466  |
| C13  | 0.368110  | 3.769065  | 0.000148  |
| O14  | -2.046262 | -2.123514 | 0.002265  |
| H15  | -2.417740 | -2.477673 | 0.847736  |
| H16  | -2.584231 | -2.384936 | -0.785377 |
| H17  | -1.516028 | 2.669753  | -0.000985 |
| H18  | -0.101520 | 4.750222  | -0.000221 |
| H19  | 2.416871  | 4.498444  | 0.002818  |
| H20  | 3.409224  | 2.203611  | 0.003848  |
| H21  | 4.067850  | 0.074306  | 0.002300  |
| H22  | 4.560761  | -2.365971 | -0.001137 |
| H23  | 2.687767  | -4.022573 | -0.005850 |
| H24  | 0.320435  | -3.252275 | -0.007602 |
| O25  | -2.951518 | 0.743775  | -0.000898 |
| H26  | -3.505816 | 0.720303  | -0.819971 |
| H27  | -3.516572 | 0.693678  | 0.809524  |

E(RB+HF-LYP) = -750.635073323 Hartree



**Table S8.** Cartesian coordinates of a fully optimized structure of Pt(ppy)(OH)(OH<sub>2</sub>) (**8**) in water. The structure was optimized using the B3LYP level of DFT and the LanL2DZ basis set using the PCM method (water) in Gaussian 03.

| Atom | X         | Y         | Z         |
|------|-----------|-----------|-----------|
| Pt1  | -1.020577 | -0.279673 | -0.001622 |
| C2   | 0.783226  | -1.171432 | -0.006029 |
| C3   | 3.502126  | -2.072733 | -0.002042 |
| C4   | 1.883498  | -0.248750 | 0.005818  |
| C5   | 1.095204  | -2.553480 | -0.021226 |
| C6   | 2.434063  | -2.999675 | -0.017841 |
| C7   | 3.225221  | -0.694597 | 0.008115  |
| N8   | 0.119654  | 1.362386  | -0.000570 |
| C9   | 1.806520  | 3.581641  | 0.006748  |
| C10  | -0.412818 | 2.616184  | -0.006744 |
| C11  | 1.490583  | 1.165585  | 0.007764  |
| C12  | 2.346241  | 2.286293  | 0.012926  |
| C13  | 0.405190  | 3.750974  | -0.004525 |
| O14  | -2.167410 | -2.053087 | -0.014244 |
| H15  | -2.077677 | -2.689403 | 0.737629  |
| H16  | -3.100968 | -2.005928 | -0.339813 |
| H17  | -1.498021 | 2.655409  | -0.011198 |
| H18  | -0.047728 | 4.740020  | -0.010131 |
| H19  | 2.466352  | 4.448521  | 0.010382  |
| H20  | 3.424269  | 2.141344  | 0.020379  |
| H21  | 4.051076  | 0.017775  | 0.016923  |
| H22  | 4.533368  | -2.424273 | 0.000171  |
| H23  | 2.647560  | -4.069528 | -0.028954 |
| H24  | 0.294436  | -3.293035 | -0.041176 |
| O25  | -2.791198 | 0.862404  | -0.015092 |
| H26  | -3.610692 | 0.322315  | 0.113201  |

E(RB+HF-LYP) = -750.160800211 Hartree

**Table S9.** Cartesian coordinates of a fully optimized structure of Pt(ppy)(OH)(OH<sub>2</sub>) (**9**) in water. The structure was optimized using the B3LYP level of DFT and the LanL2DZ basis set using the PCM method (water) in Gaussian 03.

| Atom | X         | Y         | Z         |
|------|-----------|-----------|-----------|
| Pt1  | -0.950486 | -0.461982 | -0.000089 |
| N2   | -0.074117 | 1.379625  | -0.001419 |
| C3   | 1.307703  | 3.816392  | 0.001444  |
| C4   | 1.311547  | 1.380867  | 0.000327  |
| C5   | -0.759907 | 2.557266  | -0.002755 |
| C6   | -0.103029 | 3.793489  | -0.001600 |
| C7   | 2.013068  | 2.602538  | 0.002329  |
| C8   | 0.944943  | -1.035417 | 0.000278  |
| C9   | 3.742339  | -1.563870 | -0.000817 |
| C10  | 1.423320  | -2.364632 | -0.001004 |
| C11  | 1.897809  | 0.033509  | 0.000932  |
| C12  | 3.286374  | -0.233902 | 0.000385  |
| C13  | 2.809620  | -2.626780 | -0.001440 |
| O14  | -3.047405 | 0.314464  | -0.001294 |
| H15  | -3.603753 | 0.182110  | -0.807785 |
| H16  | -3.588492 | 0.220150  | 0.820806  |
| H17  | 0.706892  | -3.183319 | -0.001260 |
| H18  | 3.165518  | -3.657913 | -0.002511 |
| H19  | 4.811518  | -1.773869 | -0.001289 |
| H20  | 4.010430  | 0.581484  | 0.000588  |
| H21  | 3.100968  | 2.600836  | 0.004570  |
| H22  | 1.845405  | 4.763669  | 0.003097  |
| H23  | -0.686680 | 4.711653  | -0.002766 |
| H24  | -1.842042 | 2.479985  | -0.005270 |
| O25  | -1.681730 | -2.359485 | 0.004320  |
| H26  | -2.672654 | -2.344135 | -0.003999 |

E(RB+HF-LYP) = -750.171657739 Hartree

**Table S10.** Electronic transitions of [Pt(ppy)Cl<sub>2</sub>]<sup>-</sup> in water based on the TD-DFT (B3LYP/LanL2DZ, PCM, water) calculations (The corresponding MO diagrams are shown in Figures S5 and S6).

| Excited State | E (cm <sup>-1</sup> ) | λ (nm) | f <sup>a</sup> (> 0.05) | Major contributions       | CI coef  (> 0.3) |
|---------------|-----------------------|--------|-------------------------|---------------------------|------------------|
| 3             | 28673                 | 348.76 | 0.0598                  | 55 → 58 (HOMO-2 → LUMO)   | 0.53138          |
|               |                       |        |                         | 56 → 60 (HOMO-1 → LUMO+2) | 0.38247          |
| 7             | 30765                 | 325.04 | 0.0576                  | 57 → 59 (HOMO → LUMO+1)   | 0.63949          |
| 13            | 35291                 | 283.36 | 0.3369                  | 53 → 58 (HOMO-4 → LUMO)   | 0.41296          |
|               |                       |        |                         | 55 → 59 (HOMO-2 → LUMO+1) | 0.49087          |
| 18            | 40011                 | 249.93 | 0.1619                  | 56 → 61 (HOMO-1 → LUMO+3) | 0.37714          |
|               |                       |        |                         | 57 → 61 (HOMO → LUMO+3)   | 0.38828          |
| 19            | 40019                 | 249.88 | 0.0834                  | 56 → 61 (HOMO-1 → LUMO+3) | 0.55271          |
| 22            | 41603                 | 240.37 | 0.1042                  | 55 → 61 (HOMO-2 → LUMO+3) | 0.58435          |
| 23            | 41902                 | 238.65 | 0.0704                  | 52 → 60 (HOMO-5 → LUMO+2) | 0.62880          |
| 35            | 46733                 | 213.98 | 0.0711                  | 57 → 63 (HOMO → LUMO+4)   | 0.60918          |
| 37            | 47407                 | 210.94 | 0.3829                  | 50 → 60 (HOMO-7 → LUMO+2) | 0.47566          |
| 44            | 49159                 | 203.42 | 0.0735                  | 48 → 60 (HOMO-9 → LUMO+2) | 0.35099          |
|               |                       |        |                         | 56 → 63 (HOMO-1 → LUMO+4) | 0.48884          |
| 45            | 49643                 | 201.44 | 0.0511                  | 55 → 63 (HOMO-2 → LUMO+4) | -0.40005         |
|               |                       |        |                         | 56 → 64 (HOMO-1 → LUMO+5) | 0.47170          |

<sup>a</sup>Oscillator strength.

**Table S11.** Electronic transitions of **2** in water based on the TD-DFT (B3LYP/LanL2DZ, PCM, water) calculations (The corresponding MO diagrams are shown in Figures S7 and S8).

| Excited State | E (cm <sup>-1</sup> ) | λ (nm) | f <sup>a</sup> (> 0.05) | Major contributions       | CI coef  (> 0.3) |
|---------------|-----------------------|--------|-------------------------|---------------------------|------------------|
| 3             | 29569                 | 338.19 | 0.0867                  | 56 → 59 (HOMO-2 → LUMO)   | 0.61703          |
| 10            | 33718                 | 296.58 | 0.111                   | 55 → 59 (HOMO-3 → LUMO)   | 0.44383          |
|               |                       |        |                         | 56 → 60 (HOMO-2 → LUMO+1) | 0.42174          |
| 12            | 35718                 | 279.97 | 0.3425                  | 55 → 59 (HOMO-3 → LUMO)   | -0.37240         |
|               |                       |        |                         | 56 → 60 (HOMO-2 → LUMO+1) | 0.50237          |
| 15            | 40261                 | 248.38 | 0.1252                  | 53 → 59 (HOMO-5 → LUMO)   | 0.44973          |
|               |                       |        |                         | 58 → 62 (HOMO → LUMO+3)   | -0.40805         |
| 19            | 42615                 | 234.66 | 0.2911                  | 56 → 62 (HOMO-2 → LUMO+3) | 0.47912          |
|               |                       |        |                         | 58 → 62 (HOMO → LUMO+3)   | 0.36399          |
| 32            | 47601                 | 210.08 | 0.0987                  | 53 → 60 (HOMO-5 → LUMO+1) | 0.52970          |
| 36            | 49111                 | 203.62 | 0.0618                  | 54 → 63 (HOMO-4 → LUMO+4) | 0.60886          |
| 38            | 49436                 | 202.28 | 0.1093                  | 57 → 65 (HOMO-1 → LUMO+6) | 0.66467          |
| 39            | 49593                 | 201.64 | 0.0581                  | 56 → 65 (HOMO-2 → LUMO+6) | 0.31708          |

<sup>a</sup>Oscillator strength.

**Table S12.** Electronic transitions of **3** in water based on the TD-DFT (B3LYP/LanL2DZ, PCM, water) calculations (The corresponding MO diagrams are shown in Figures S9 and S10).

| Excited State | E (cm <sup>-1</sup> ) | λ (nm) | <i>f</i> <sup>a</sup> (> 0.05) | Major contributions       | CI coef  (> 0.3) |
|---------------|-----------------------|--------|--------------------------------|---------------------------|------------------|
| 6             | 32285                 | 309.74 | 0.0751                         | 56 → 59 (HOMO-2 → LUMO)   | 0.56223          |
| 9             | 33887                 | 295.10 | 0.1967                         | 54 → 59 (HOMO-4 → LUMO)   | 0.55252          |
| 14            | 38168                 | 262.00 | 0.3410                         | 56 → 60 (HOMO-2 → LUMO+1) | 0.56750          |
| 18            | 40962                 | 244.13 | 0.3015                         | 58 → 62 (HOMO → LUMO+3)   | 0.53804          |
| 33            | 47179                 | 211.96 | 0.0605                         | 58 → 65 (HOMO → LUMO+6)   | 0.56468          |
| 35            | 47941                 | 208.59 | 0.3613                         | 51 → 61 (HOMO-7 → LUMO+2) | -0.30245         |
|               |                       |        |                                | 52 → 61 (HOMO-6 → LUMO+2) | 0.43066          |
| 39            | 49576                 | 201.71 | 0.1029                         | 57 → 65 (HOMO-2 → LUMO+6) | 0.66200          |

<sup>a</sup>Oscillator strength.

**Table S13.** Electronic transitions of Pt<sub>2</sub>(ppy)<sub>2</sub>(μ-Cl)<sub>2</sub> (**4**) in water based on the TD-DFT (B3LYP/LanL2DZ, PCM, water) calculations (The corresponding MO diagrams and the simulated absorption spectra are shown in Figures S11, S12 and S26).

| Excited State | E (cm <sup>-1</sup> ) | λ (nm) | <i>f</i> <sup>a</sup> (> 0.05) | Transition                  | CI coef  (> 0.3) |
|---------------|-----------------------|--------|--------------------------------|-----------------------------|------------------|
| 9             | 28811                 | 347.09 | 0.0775                         | 105 → 107 (HOMO-1 → LUMO)   | 0.53911          |
|               |                       |        |                                | 106 → 108 (HOMO → LUMO+1)   | -0.41947         |
| 15            | 30802                 | 324.65 | 0.1381                         | 102 → 107 (HOMO-4 → LUMO)   | 0.56866          |
| 17            | 31821                 | 314.26 | 0.0893                         | 105 → 111 (HOMO-1 → LUMO+4) | 0.35343          |
|               |                       |        |                                | 106 → 110 (HOMO → LUMO+3)   | 0.49004          |
| 24            | 33780                 | 296.03 | 0.2521                         | 99 → 107 (HOMO-7 → LUMO)    | -0.32755         |
|               |                       |        |                                | 100 → 108 (HOMO-6 → LUMO+1) | 0.33926          |
|               |                       |        |                                | 105 → 111 (HOMO-1 → LUMO+4) | 0.32673          |
| 32            | 34740                 | 287.85 | 0.1433                         | 105 → 111 (HOMO-1 → LUMO+4) | -0.41014         |
|               |                       |        |                                | 106 → 110 (HOMO → LUMO+3)   | 0.44699          |
| 43            | 37081                 | 269.68 | 0.4676                         | 102 → 111 (HOMO-4 → LUMO+4) | 0.51652          |
| 49            | 39712                 | 251.81 | 0.0671                         | 99 → 111 (HOMO-7 → LUMO+4)  | -0.40162         |
|               |                       |        |                                | 100 → 110 (HOMO-6 → LUMO+3) | 0.49487          |
| 51            | 40130                 | 249.19 | 0.2124                         | 95 → 107 (HOMO-11 → LUMO)   | -0.33924         |
|               |                       |        |                                | 96 → 108 (HOMO-10 → LUMO+1) | 0.36712          |
|               |                       |        |                                | 106 → 113 (HOMO → LUMO+6)   | 0.34099          |
| 59            | 41651                 | 240.09 | 0.2875                         | 96 → 108 (HOMO-10 → LUMO+1) | -0.33800         |
|               |                       |        |                                | 106 → 113 (HOMO → LUMO+6)   | 0.47092          |
| 62            | 42626                 | 234.60 | 0.2960                         | 105 → 114 (HOMO-1 → LUMO+7) | 0.59094          |
| 70            | 43725                 | 228.70 | 0.1381                         | 95 → 107 (HOMO-11 → LUMO)   | -0.32910         |
|               |                       |        |                                | 96 → 108 (HOMO-10 → LUMO+1) | -0.30837         |
|               |                       |        |                                | 97 → 109 (HOMO-9 → LUMO+2)  | 0.31743          |
|               |                       |        |                                | 98 → 112 (HOMO-8 → LUMO+5)  | 0.38540          |
| 74            | 44258                 | 225.95 | 0.1048                         | 102 → 114 (HOMO-4 → LUMO+7) | 0.45871          |
| 79            | 45177                 | 221.35 | 0.0546                         | 106 → 115 (HOMO → LUMO+8)   | 0.36692          |
| 93            | 47414                 | 210.91 | 0.2120                         | 96 → 110 (HOMO-10 → LUMO+3) | 0.42472          |
| 109           | 49232                 | 203.12 | 0.1456                         | 95 → 111 (HOMO-11 → LUMO+4) | 0.36086          |
| 111           | 49574                 | 201.72 | 0.1434                         | 99 → 114 (HOMO-7 → LUMO+7)  | 0.31642          |
|               |                       |        |                                | 100 → 113 (HOMO-6 → LUMO+6) | 0.43581          |
| 115           | 49816                 | 200.74 | 0.0587                         | 89 → 107 (HOMO-17 → LUMO)   | 0.35165          |
|               |                       |        |                                | 99 → 114 (HOMO-7 → LUMO+7)  | 0.36196          |

<sup>a</sup>Oscillator strength.

**Table S14.** Electronic transitions of **5** in water based on the TD-DFT (B3LYP/LanL2DZ, PCM, water) calculations (The corresponding MO diagrams are shown in Figures S13 and S14).

| Excited State | E (cm <sup>-1</sup> ) | λ (nm) | <i>f</i> <sup>a</sup> (> 0.05) | Major contributions       | CI coef  (> 0.3) |
|---------------|-----------------------|--------|--------------------------------|---------------------------|------------------|
| 5             | 28730                 | 348.07 | 0.0945                         | 56 → 59 (HOMO-2 → LUMO)   | 0.64316          |
| 11            | 33872                 | 295.23 | 0.0521                         | 52 → 59 (HOMO-6 → LUMO)   | 0.51296          |
|               |                       |        |                                | 56 → 60 (HOMO-2 → LUMO+1) | 0.36080          |
| 13            | 35283                 | 283.42 | 0.1970                         | 52 → 59 (HOMO-6 → LUMO)   | -0.37768         |
|               |                       |        |                                | 56 → 60 (HOMO-2 → LUMO+1) | 0.41706          |
| 15            | 36660                 | 272.78 | 0.2162                         | 58 → 62 (HOMO → LUMO+3)   | 0.55798          |
| 18            | 37919                 | 263.72 | 0.2097                         | 55 → 60 (HOMO-3 → LUMO+1) | 0.57519          |
| 24            | 41873                 | 238.82 | 0.0734                         | 58 → 65 (HOMO → LUMO+6)   | 0.55351          |
| 28            | 43869                 | 227.95 | 0.3145                         | 53 → 61 (HOMO-5 → LUMO+2) | 0.46910          |
|               |                       |        |                                | 54 → 61 (HOMO-7 → LUMO+2) | -0.35047         |
| 41            | 48305                 | 207.02 | 0.1101                         | 57 → 65 (HOMO-1 → LUMO+6) | 0.67294          |
| 42            | 48403                 | 206.60 | 0.0628                         | 50 → 60 (HOMO-8 → LUMO+1) | 0.42044          |
| 46            | 49960                 | 200.16 | 0.1025                         | 49 → 60 (HOMO-9 → LUMO+1) | 0.47133          |
|               |                       |        |                                | 52 → 62 (HOMO-6 → LUMO+3) | 0.33210          |

<sup>a</sup>Oscillator strength.

**Table S15.** Electronic transitions of **6** in water based on the TD-DFT (B3LYP/LanL2DZ, PCM, water) calculations (The corresponding MO diagrams are shown in Figures S15 and S16).

| Excited State | E (cm <sup>-1</sup> ) | λ (nm) | <i>f</i> <sup>a</sup> (> 0.05) | Major contributions       | CI coef  (> 0.3) |
|---------------|-----------------------|--------|--------------------------------|---------------------------|------------------|
| 3             | 25816                 | 387.36 | 0.0665                         | 57 → 59 (HOMO-1 → LUMO)   | 0.57528          |
| 4             | 28618                 | 349.43 | 0.1161                         | 58 → 60 (HOMO → LUMO+1)   | 0.61452          |
| 9             | 34363                 | 291.01 | 0.2523                         | 54 → 59 (HOMO-4 → LUMO)   | 0.60065          |
| 20            | 40368                 | 247.72 | 0.4548                         | 57 → 61 (HOMO-1 → LUMO+2) | 0.53371          |
| 30            | 44342                 | 225.52 | 0.0546                         | 57 → 63 (HOMO-1 → LUMO+4) | 0.59227          |
| 39            | 47522                 | 210.43 | 0.1044                         | 56 → 65 (HOMO-2 → LUMO+6) | 0.67877          |
| 41            | 48914                 | 204.44 | 0.0904                         | 49 → 60 (HOMO-9 → LUMO+1) | 0.52684          |
| 44            | 49210                 | 203.21 | 0.1237                         | 50 → 60 (HOMO-8 → LUMO+1) | 0.37904          |
|               |                       |        |                                | 54 → 61 (HOMO-4 → LUMO+2) | -0.31722         |

<sup>a</sup>Oscillator strength

**Table S16.** Electronic transitions of **7** in water based on the TD-DFT (B3LYP/LanL2DZ, PCM, water) calculations (The corresponding MO diagrams are shown in Figures S17 and S18).

| Excited State | E (cm <sup>-1</sup> ) | $\lambda$ (nm) | $f^a$ (> 0.05) | Major contributions                               | CI coef  (> 0.3) |
|---------------|-----------------------|----------------|----------------|---------------------------------------------------|------------------|
| 6             | 33008                 | 302.96         | 0.0813         | 57 $\rightarrow$ 60 (HOMO-2 $\rightarrow$ LUMO)   | 0.51823          |
|               |                       |                |                | 58 $\rightarrow$ 62 (HOMO-1 $\rightarrow$ LUMO+2) | -0.32227         |
| 8             | 34579                 | 289.19         | 0.2366         | 56 $\rightarrow$ 60 (HOMO-3 $\rightarrow$ LUMO)   | 0.46859          |
| 12            | 38679                 | 258.54         | 0.2629         | 57 $\rightarrow$ 61 (HOMO-2 $\rightarrow$ LUMO+1) | 0.56063          |
| 14            | 40876                 | 244.64         | 0.1735         | 54 $\rightarrow$ 60 (HOMO-5 $\rightarrow$ LUMO)   | 0.46582          |
|               |                       |                |                | 59 $\rightarrow$ 63 (HOMO $\rightarrow$ LUMO+3)   | 0.37466          |
| 19            | 42203                 | 236.95         | 0.1535         | 54 $\rightarrow$ 60 (HOMO-5 $\rightarrow$ LUMO)   | -0.33536         |
|               |                       |                |                | 58 $\rightarrow$ 64 (HOMO-1 $\rightarrow$ LUMO+4) | 0.52274          |
| 20            | 42883                 | 233.19         | 0.0686         | 58 $\rightarrow$ 64 (HOMO-1 $\rightarrow$ LUMO+4) | -0.40035         |
|               |                       |                |                | 59 $\rightarrow$ 63 (HOMO $\rightarrow$ LUMO+3)   | 0.39853          |
| 27            | 48119                 | 207.82         | 0.0951         | 54 $\rightarrow$ 61 (HOMO-5 $\rightarrow$ LUMO+1) | 0.58887          |

<sup>a</sup>Oscillator strength

**Table S17.** Electronic transitions of **8** in water based on the TD-DFT (B3LYP/LanL2DZ, PCM, water) calculations (The corresponding MO diagrams are shown in Figures S19 and S20).

| Excited State | E (cm <sup>-1</sup> ) | $\lambda$ (nm) | $f^a$ (> 0.05) | Major contributions                               | CI coef  (> 0.3) |
|---------------|-----------------------|----------------|----------------|---------------------------------------------------|------------------|
| 5             | 30314                 | 329.88         | 0.0607         | 57 $\rightarrow$ 60 (HOMO-2 $\rightarrow$ LUMO)   | 0.62458          |
| 7             | 32816                 | 304.73         | 0.0878         | 55 $\rightarrow$ 60 (HOMO-4 $\rightarrow$ LUMO)   | 0.45099          |
|               |                       |                |                | 56 $\rightarrow$ 60 (HOMO-3 $\rightarrow$ LUMO)   | 0.36868          |
|               |                       |                |                | 57 $\rightarrow$ 61 (HOMO-2 $\rightarrow$ LUMO+1) | -0.30553         |
| 14            | 37067                 | 269.78         | 0.3029         | 57 $\rightarrow$ 61 (HOMO-2 $\rightarrow$ LUMO+1) | 0.50562          |
| 15            | 37392                 | 267.44         | 0.2029         | 56 $\rightarrow$ 61 (HOMO-3 $\rightarrow$ LUMO+1) | 0.41534          |
|               |                       |                |                | 59 $\rightarrow$ 63 (HOMO $\rightarrow$ LUMO+3)   | 0.45756          |
| 16            | 37488                 | 266.75         | 0.1106         | 55 $\rightarrow$ 61 (HOMO-2 $\rightarrow$ LUMO+1) | 0.42503          |
|               |                       |                |                | 56 $\rightarrow$ 61 (HOMO-3 $\rightarrow$ LUMO+1) | -0.35455         |
|               |                       |                |                | 59 $\rightarrow$ 63 (HOMO $\rightarrow$ LUMO+3)   | 0.32649          |
| 18            | 38671                 | 258.59         | 0.0602         | 55 $\rightarrow$ 61 (HOMO-4 $\rightarrow$ LUMO+1) | 0.46282          |
|               |                       |                |                | 56 $\rightarrow$ 61 (HOMO-3 $\rightarrow$ LUMO+1) | 0.35735          |
| 26            | 43491                 | 229.93         | 0.0867         | 57 $\rightarrow$ 63 (HOMO-2 $\rightarrow$ LUMO+3) | 0.40500          |
| 29            | 44279                 | 225.84         | 0.0613         | 57 $\rightarrow$ 63 (HOMO-2 $\rightarrow$ LUMO+3) | 0.33044          |
| 34            | 46812                 | 213.62         | 0.1261         | 55 $\rightarrow$ 63 (HOMO-4 $\rightarrow$ LUMO+3) | 0.35015          |
|               |                       |                |                | 56 $\rightarrow$ 63 (HOMO-3 $\rightarrow$ LUMO+3) | 0.32522          |
| 39            | 49036                 | 203.93         | 0.0635         | 49 $\rightarrow$ 60 (HOMO-10 $\rightarrow$ LUMO)  | 0.31328          |
|               |                       |                |                | 52 $\rightarrow$ 61 (HOMO-7 $\rightarrow$ LUMO+1) | -0.34936         |
|               |                       |                |                | 58 $\rightarrow$ 66 (HOMO-1 $\rightarrow$ LUMO+6) | 0.40083          |
| 40            | 49147                 | 203.47         | 0.0621         | 58 $\rightarrow$ 66 (HOMO-1 $\rightarrow$ LUMO+6) | 0.44374          |
| 41            | 49717                 | 201.14         | 0.0755         | 55 $\rightarrow$ 64 (HOMO-4 $\rightarrow$ LUMO+4) | 0.47138          |
| 42            | 49828                 | 200.69         | 0.0614         | 57 $\rightarrow$ 65 (HOMO-2 $\rightarrow$ LUMO+5) | 0.47189          |

<sup>a</sup>Oscillator strength

**Table S18.** Electronic transitions of **9** in water based on the TD-DFT (B3LYP/LanL2DZ, PCM, water) calculations (The corresponding MO diagrams are shown in Figures S21 and S22).

| Excited State | E (cm <sup>-1</sup> ) | λ (nm) | <i>f</i> <sup>a</sup> (> 0.05) | Major contributions       | CI coef  (> 0.3) |
|---------------|-----------------------|--------|--------------------------------|---------------------------|------------------|
| 3             | 26721                 | 374.24 | 0.0571                         | 58 → 60 (HOMO-1 → LUMO)   | 0.58018          |
|               |                       |        |                                | 59 → 61 (HOMO → LUMO+1)   | -0.30106         |
| 4             | 29339                 | 340.84 | 0.1110                         | 59 → 61 (HOMO → LUMO+1)   | 0.60925          |
| 9             | 34666                 | 288.47 | 0.3099                         | 56 → 60 (HOMO-3 → LUMO)   | 0.60956          |
| 11            | 36232                 | 276.00 | 0.0507                         | 57 → 63 (HOMO-2 → LUMO+3) | 0.48839          |
|               |                       |        |                                | 57 → 64 (HOMO-2 → LUMO+4) | -0.39301         |
| 18            | 40634                 | 246.10 | 0.2241                         | 54 → 60 (HOMO-5 → LUMO)   | 0.40873          |
|               |                       |        |                                | 58 → 62 (HOMO-1 → LUMO+2) | -0.38786         |
| 20            | 41679                 | 239.93 | 0.1652                         | 54 → 60 (HOMO-5 → LUMO)   | 0.37467          |
|               |                       |        |                                | 58 → 62 (HOMO-1 → LUMO+2) | 0.37779          |
|               |                       |        |                                | 59 → 65 (HOMO → LUMO+5)   | 0.36634          |
| 23            | 42492                 | 235.34 | 0.0616                         | 59 → 65 (HOMO → LUMO+5)   | 0.52591          |
| 36            | 47578                 | 210.18 | 0.0862                         | 51 → 60 (HOMO-8 → LUMO)   | 0.30649          |
|               |                       |        |                                | 52 → 61 (HOMO-7 → LUMO+1) | -0.37901         |
|               |                       |        |                                | 54 → 61 (HOMO-5 → LUMO+1) | 0.37825          |
| 37            | 47884                 | 208.84 | 0.1043                         | 57 → 66 (HOMO-2 → LUMO+6) | 0.68233          |
| 38            | 48759                 | 205.09 | 0.0797                         | 52 → 61 (HOMO-7 → LUMO+1) | 0.41921          |

<sup>a</sup>Oscillator strength

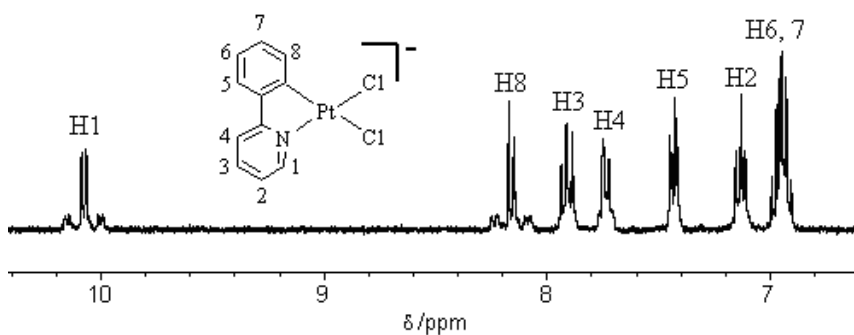

**Fig. S1** <sup>1</sup>H NMR spectrum of **1** in (CD<sub>3</sub>)<sub>2</sub>CO, where only the aromatic proton region is shown.

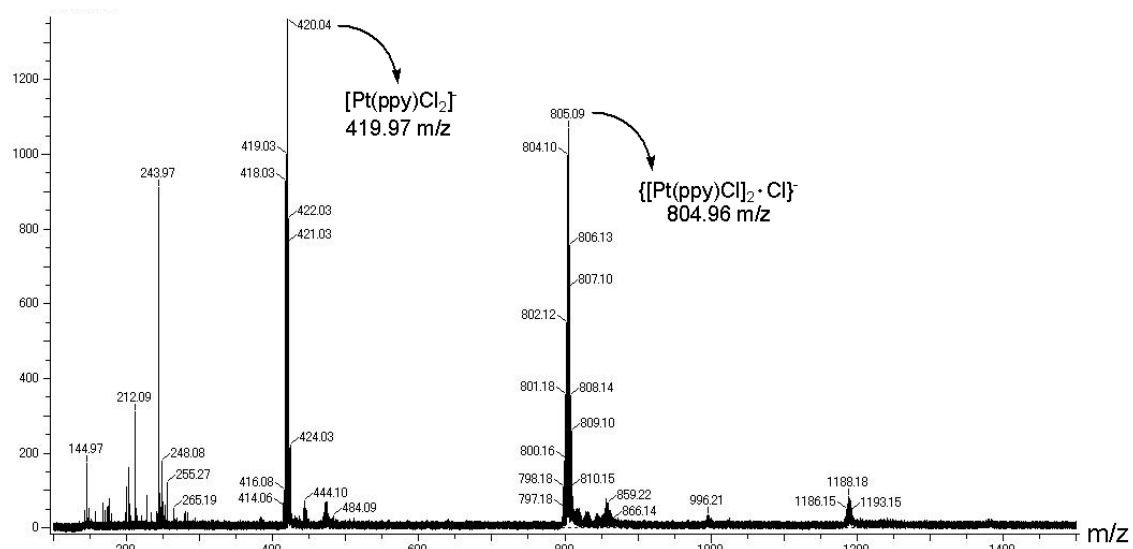

**Fig. S2** ESI-TOF mass spectrum of **4** in methanol.

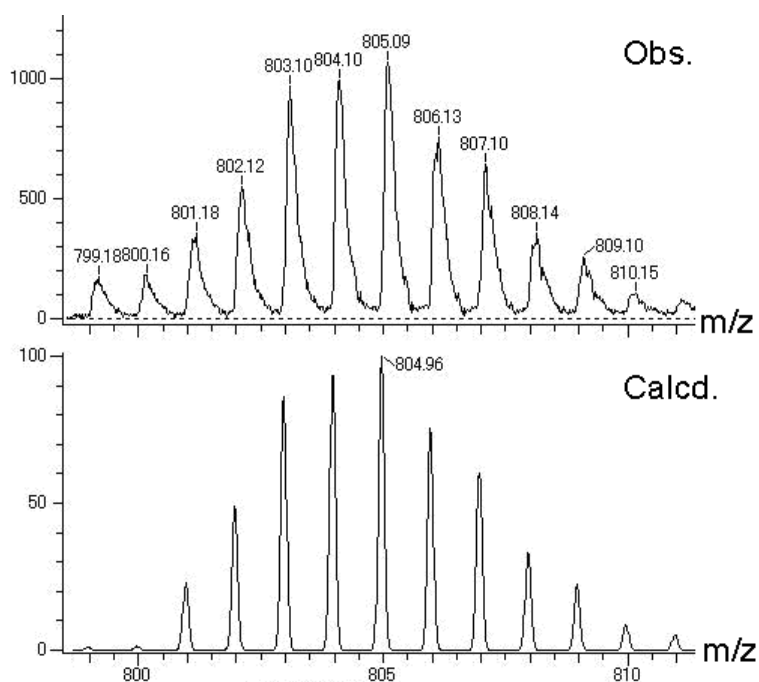

**Fig. S3** The observed (top) and calculated (bottom) negative-ion ESI-TOF mass spectra obtained for a solution of **4** in methanol, in which monovalent anion  $\{[Pt(ppy)Cl_2]_2 \cdot Cl\}^-$  is detected.



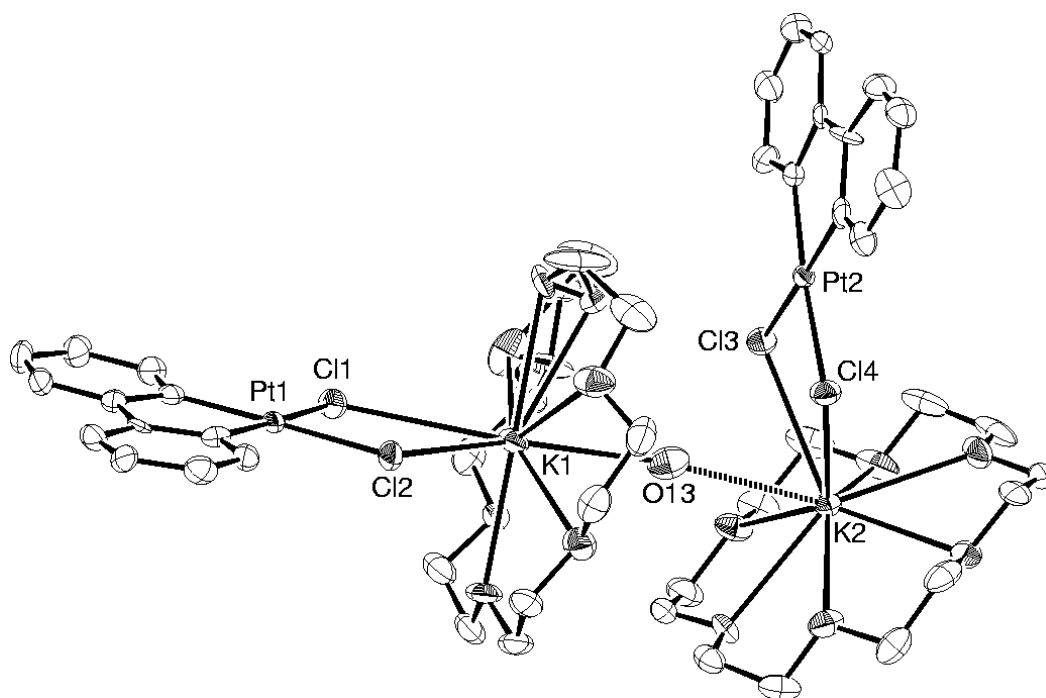

**Fig. S4** The manner how the two independent molecules in the crystal of **1** are associated with each other, where the O(water) atom is weakly associated to the K ion in the adjacent molecule at a distance of  $O(13)\cdots K(2) = 3.30(1) \text{ \AA}$ .

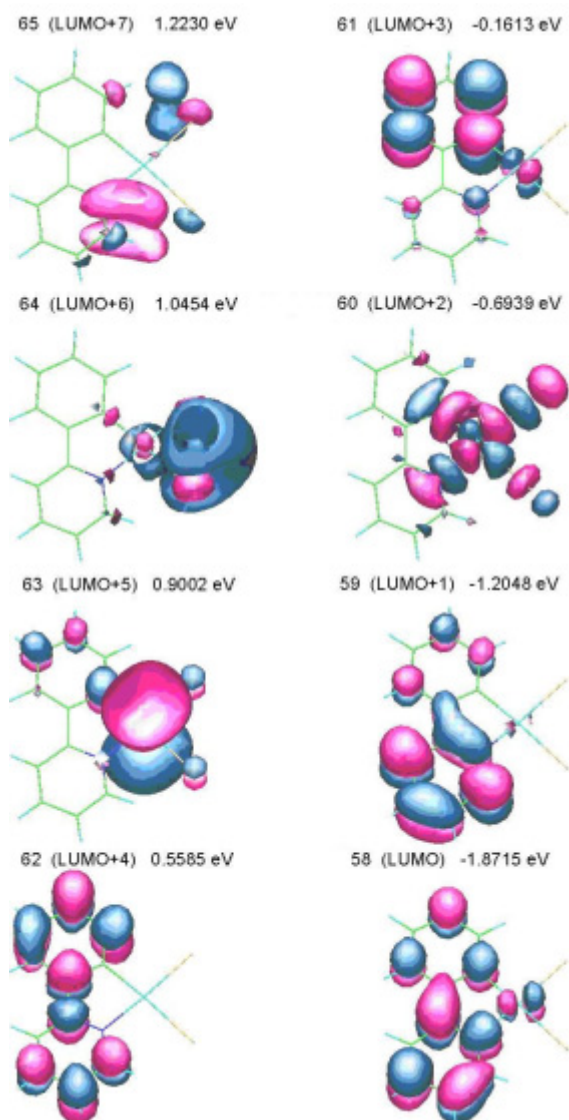

**Fig. S5** Contour plots of the B3LYP/LANL2DZ derived LUMO through LUMO+7 molecular orbitals of  $[\text{Pt}(\text{ppy})\text{Cl}_2]$ , where the structure in aqueous media was computed using the polarizable continuum model (PCM) in Gaussian 03.

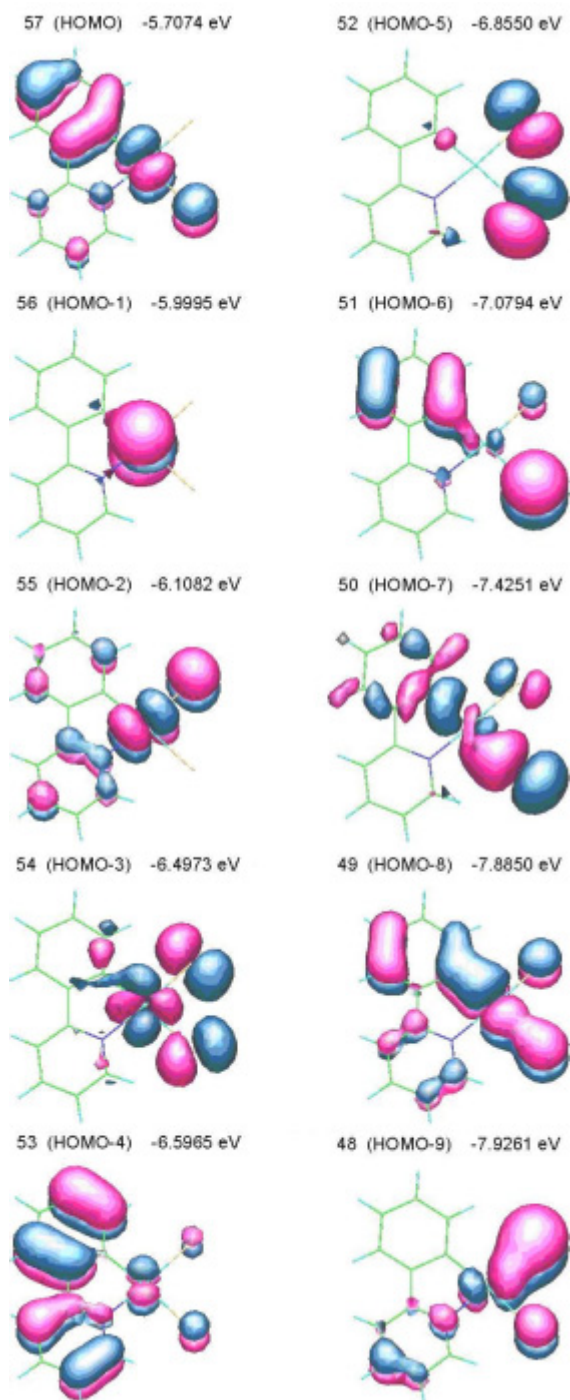

**Fig. S6** Contour plots of the B3LYP/LANL2DZ derived HOMO-9 through HOMO molecular orbitals of  $[\text{Pt}(\text{ppy})\text{Cl}_2]$ , where the structure in aqueous media was computed using the polarizable continuum model (PCM) in Gaussian 03.

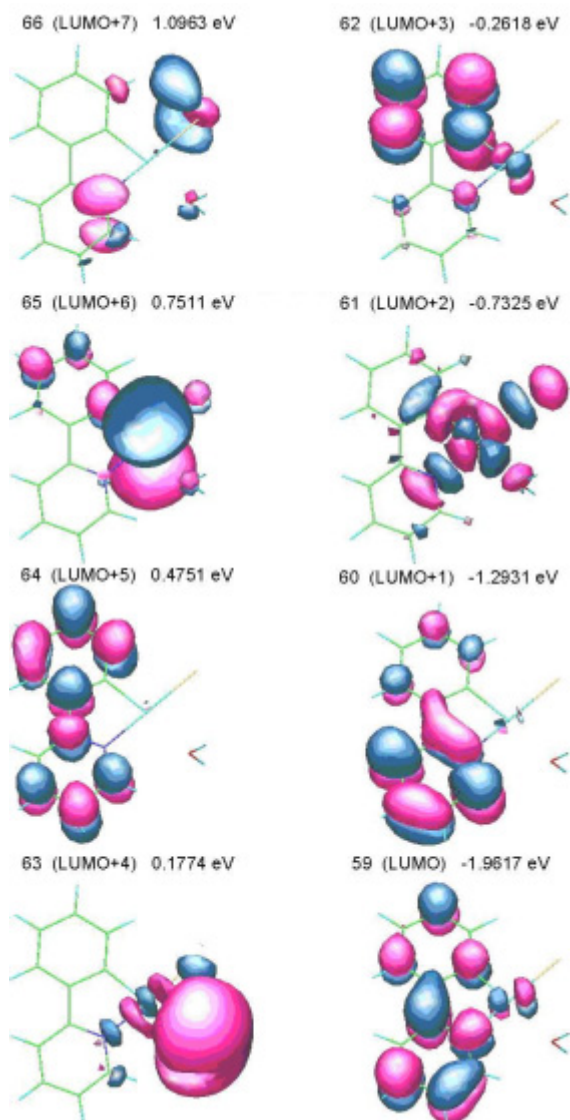

**Fig. S7** Contour plots of the B3LYP/LANL2DZ derived LUMO through LUMO+7 molecular orbitals of **2**, where the structure in aqueous media was computed using the polarizable continuum model (PCM) in Gaussian 03.

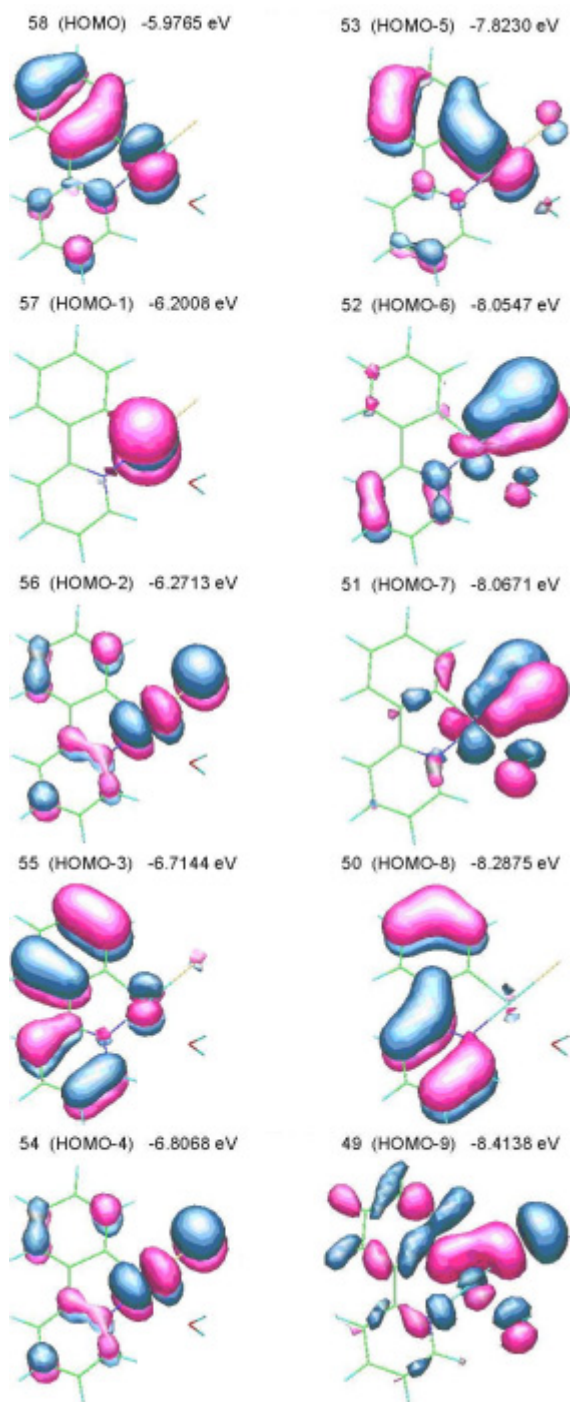

**Fig. S8** Contour plots of the B3LYP/LANL2DZ derived HOMO-9 through HOMO molecular orbitals of **2**, where the structure in aqueous media was computed using the polarizable continuum model (PCM) in Gaussian 03.

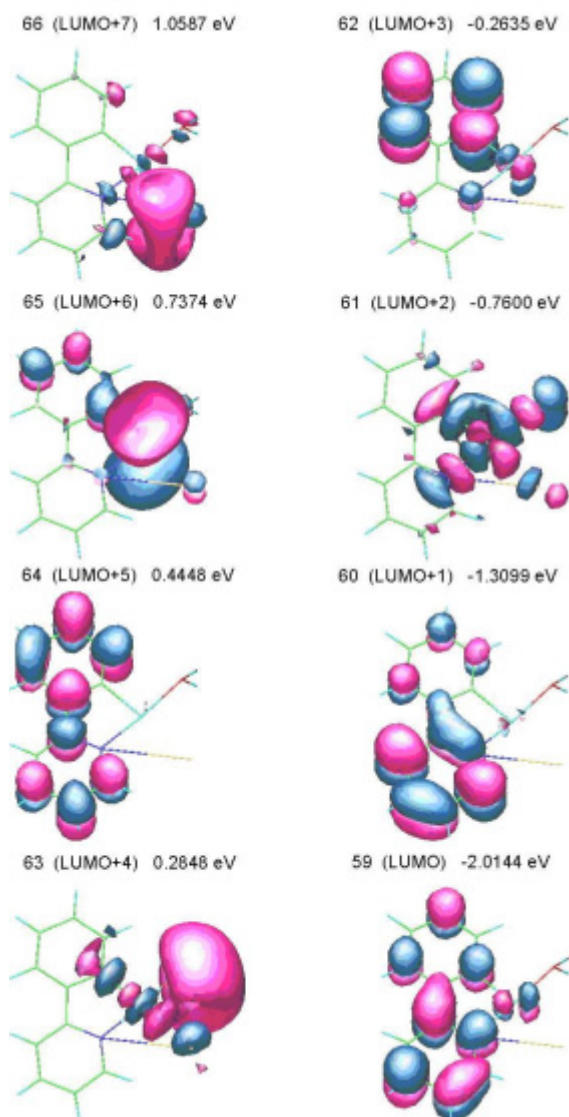

**Fig. S9** Contour plots of the B3LYP/LANL2DZ derived LUMO through LUMO+7 molecular orbitals of **3**, where the structure in aqueous media was computed using the polarizable continuum model (PCM) in Gaussian 03.

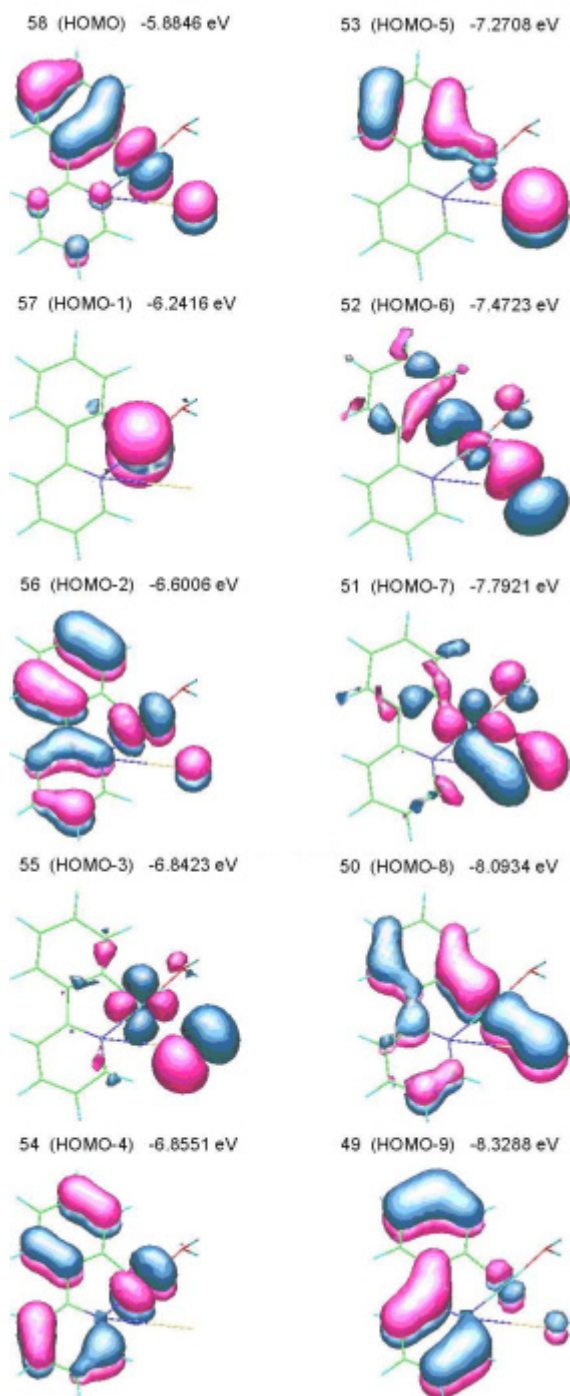

**Fig. S10** Contour plots of the B3LYP/LANL2DZ derived HOMO-9 through HOMO molecular orbitals of **3**, where the structure in aqueous media was computed using the polarizable continuum model (PCM) in Gaussian 03.

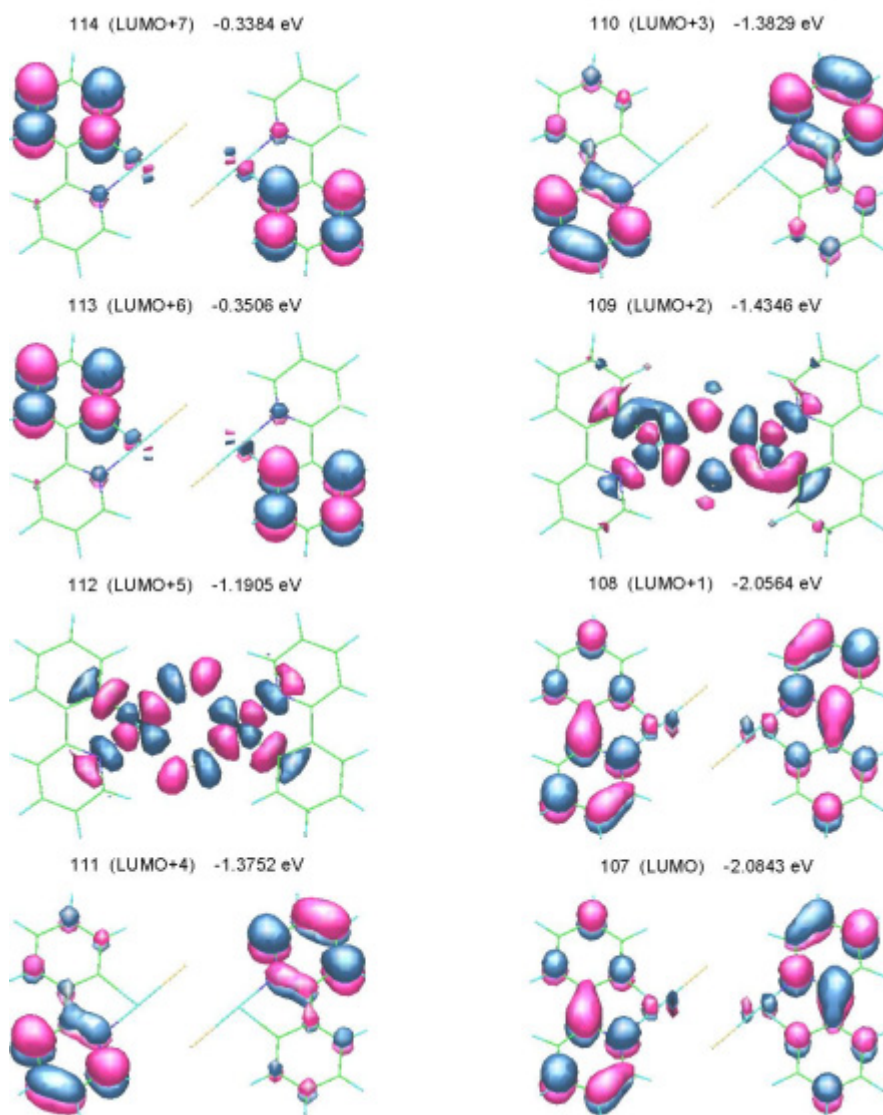

**Fig. S11** Contour plots of the B3LYP/LANL2DZ derived LUMO through LUMO+7 molecular orbitals of **4**, where the structure in aqueous media was computed using the polarizable continuum model (PCM) in Gaussian 03.



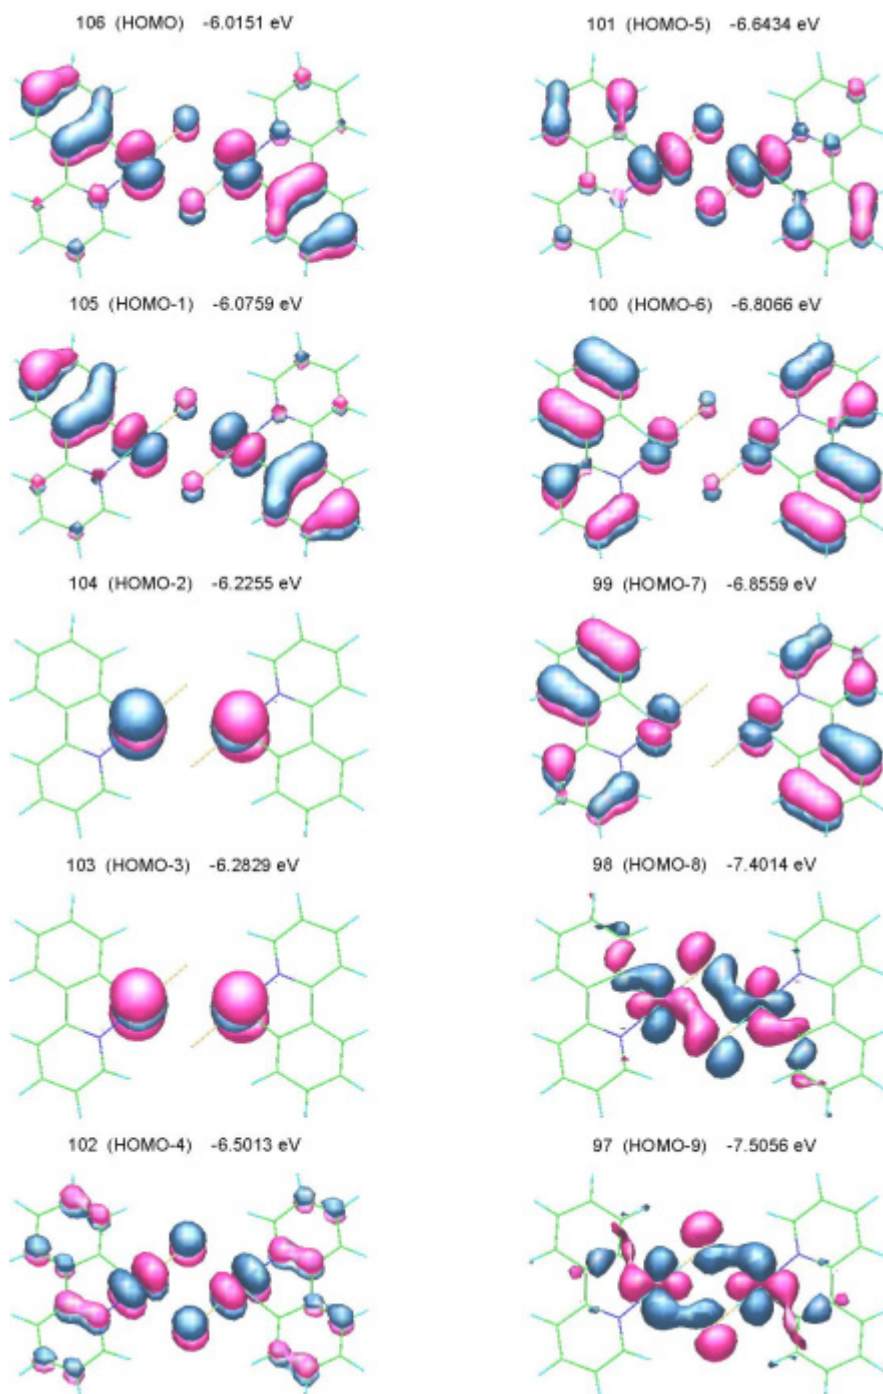

**Fig. S12** Contour plots of the B3LYP/LANL2DZ derived HOMO-9 through HOMO molecular orbitals of **4**, where the structure in aqueous media was computed using the polarizable continuum model (PCM) in Gaussian 03.

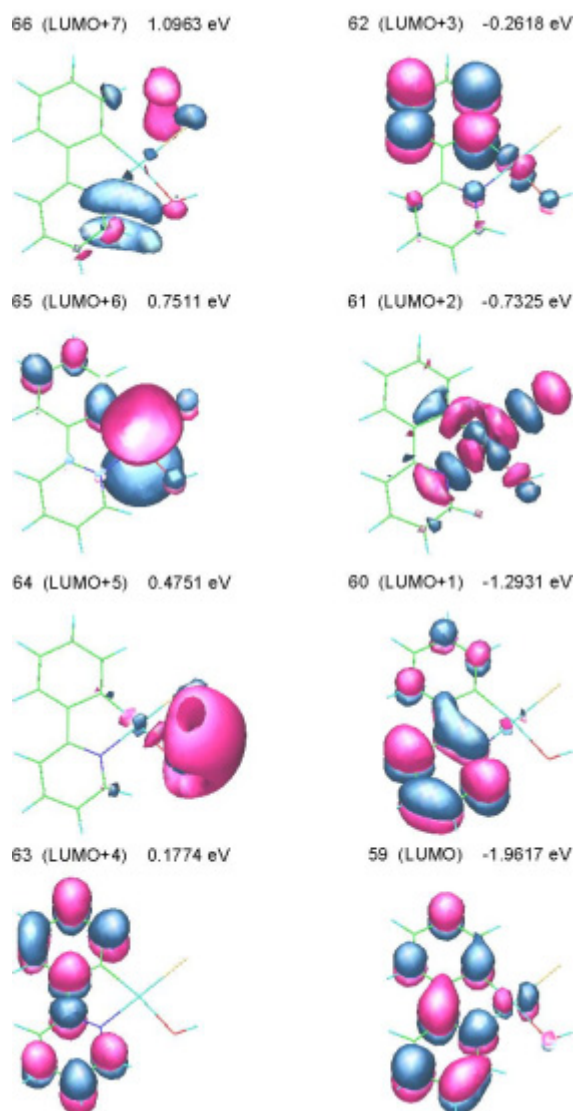

**Fig. S13** Contour plots of the B3LYP/LANL2DZ derived LUMO through LUMO+7 molecular orbitals of **5**, where the structure in aqueous media was computed using the polarizable continuum model (PCM) in Gaussian 03.

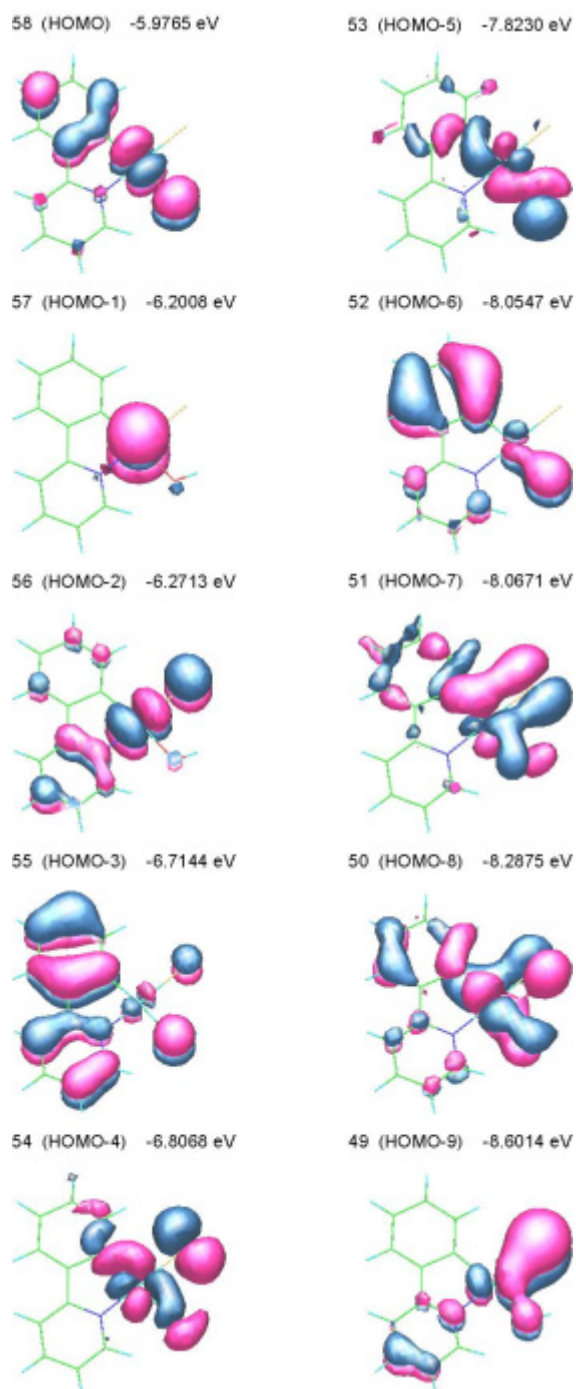

**Fig. S14** Contour plots of the B3LYP/LANL2DZ derived HOMO-9 through HOMO molecular orbitals of **5**, where the structure in aqueous media was computed using the polarizable continuum model (PCM) in Gaussian 03.

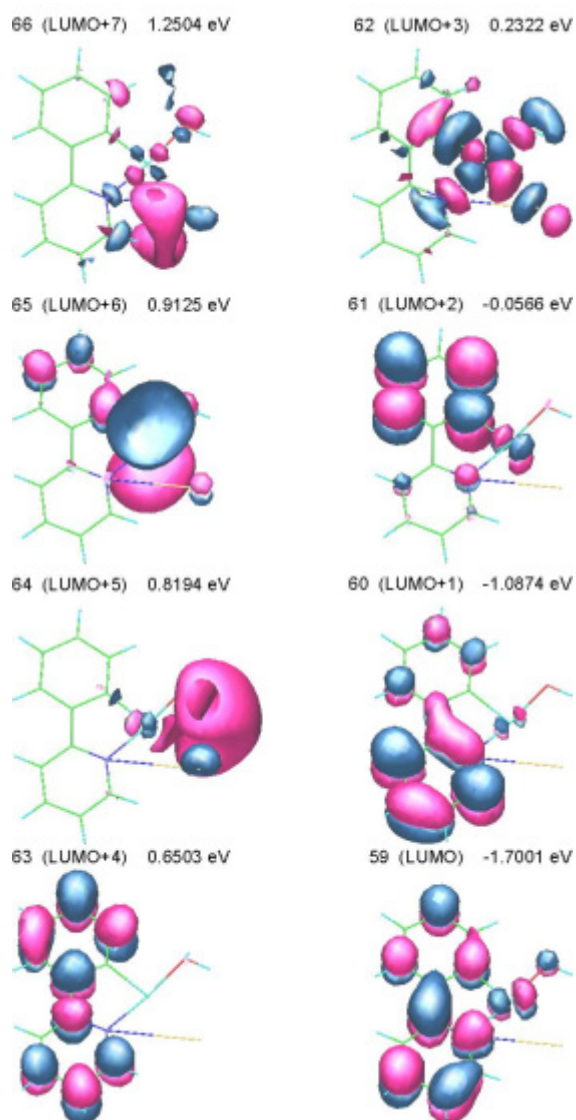

**Fig. S15** Contour plots of the B3LYP/LANL2DZ derived LUMO through LUMO+7 molecular orbitals of **6**, where the structure in aqueous media was computed using the polarizable continuum model (PCM) in Gaussian 03.

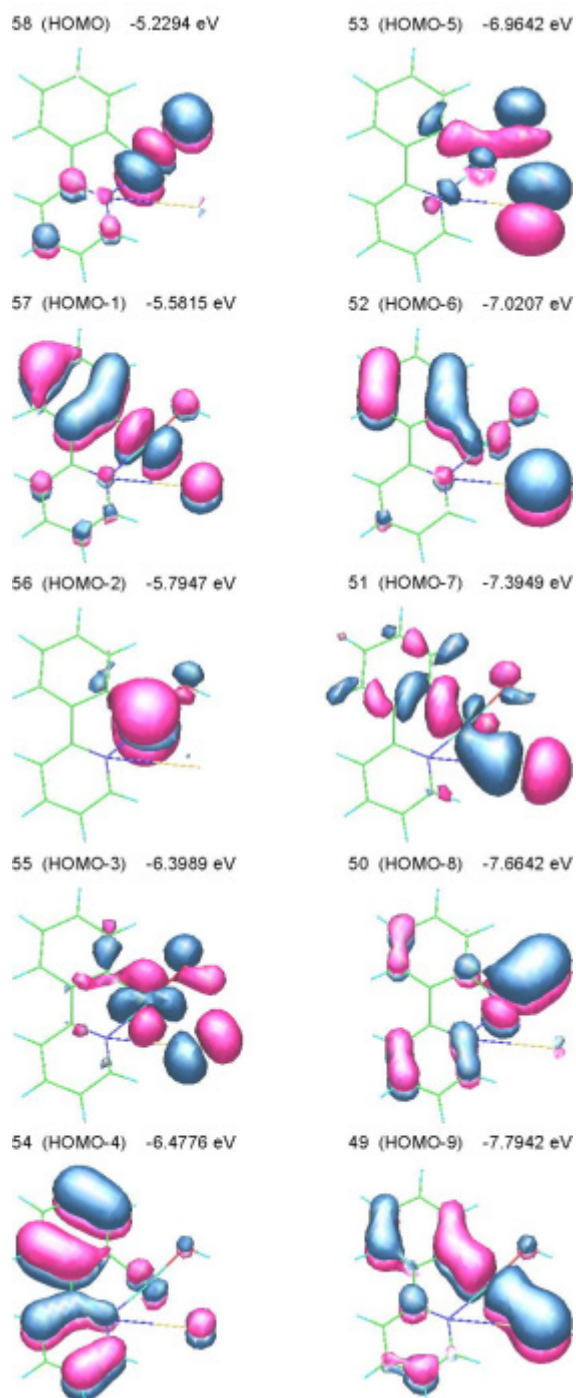

**Fig. S16** Contour plots of the B3LYP/LANL2DZ derived HOMO-9 through HOMO molecular orbitals of **6**, where the structure in aqueous media was computed using the polarizable continuum model (PCM) in Gaussian 03.

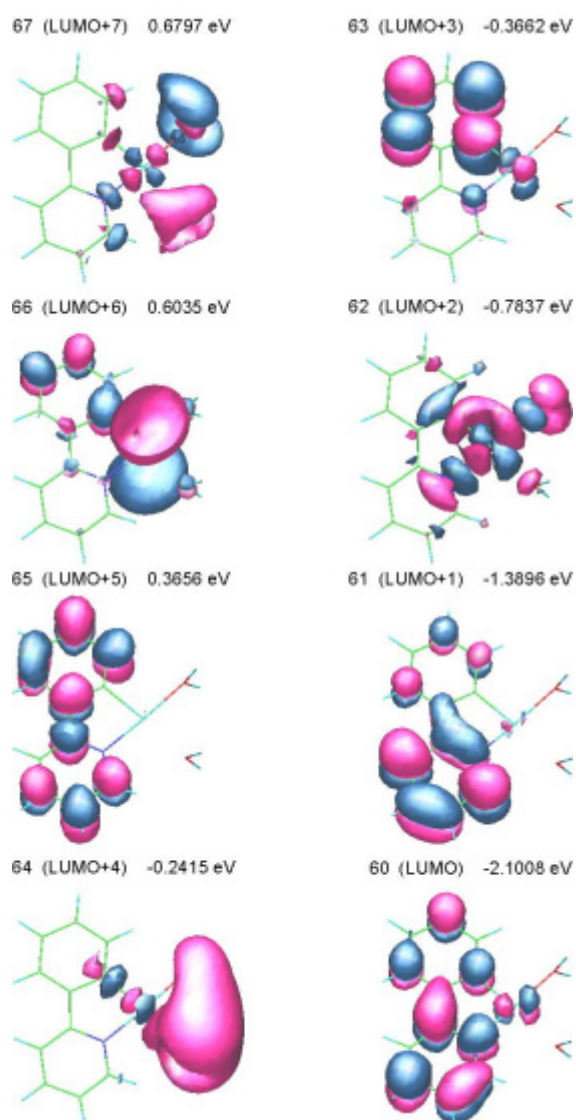

**Fig. S17** Contour plots of the B3LYP/LANL2DZ derived LUMO through LUMO+7 molecular orbitals of **7**, where the structure in aqueous media was computed using the polarizable continuum model (PCM) in Gaussian 03.

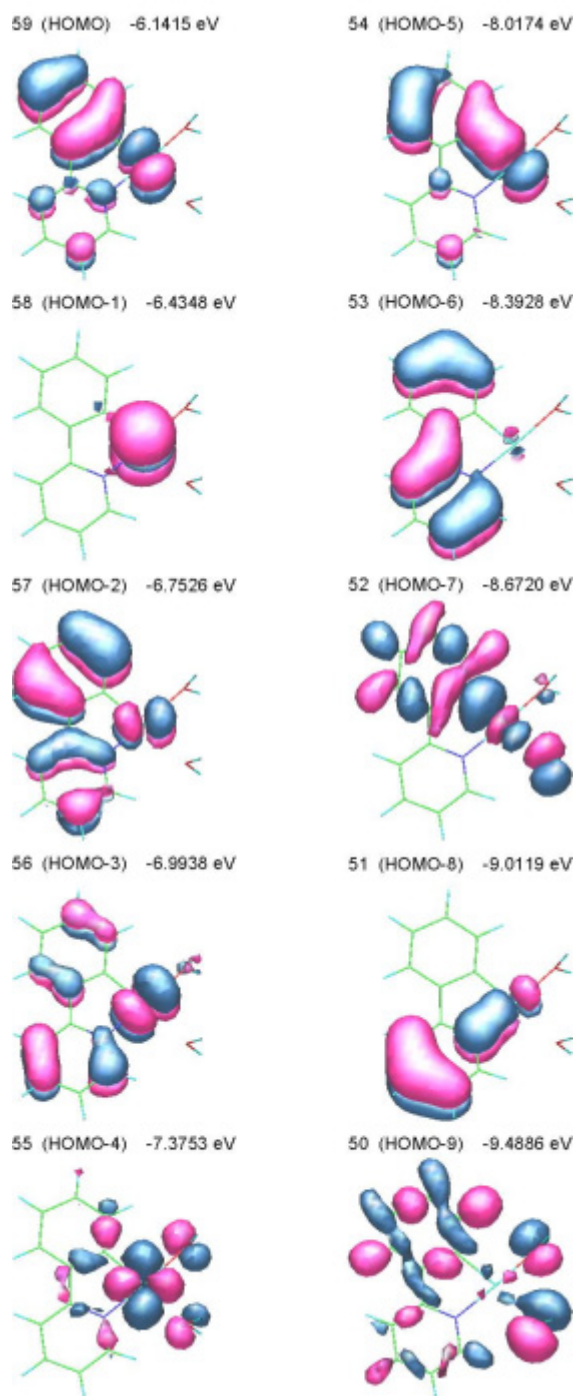

**Fig. S18** Contour plots of the B3LYP/LANL2DZ derived HOMO-9 through HOMO molecular orbitals of **7**, where the structure in aqueous media was computed using the polarizable continuum model (PCM) in Gaussian 03.

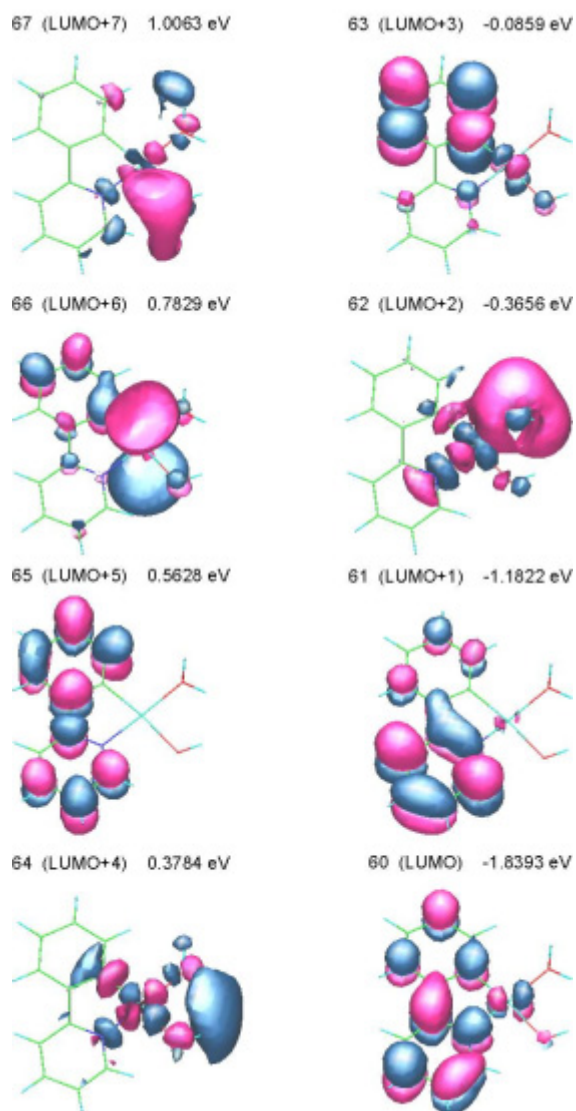

**Fig. S19** Contour plots of the B3LYP/LANL2DZ derived LUMO through LUMO+7 molecular orbitals of **8**, where the structure in aqueous media was computed using the polarizable continuum model (PCM) in Gaussian 03.



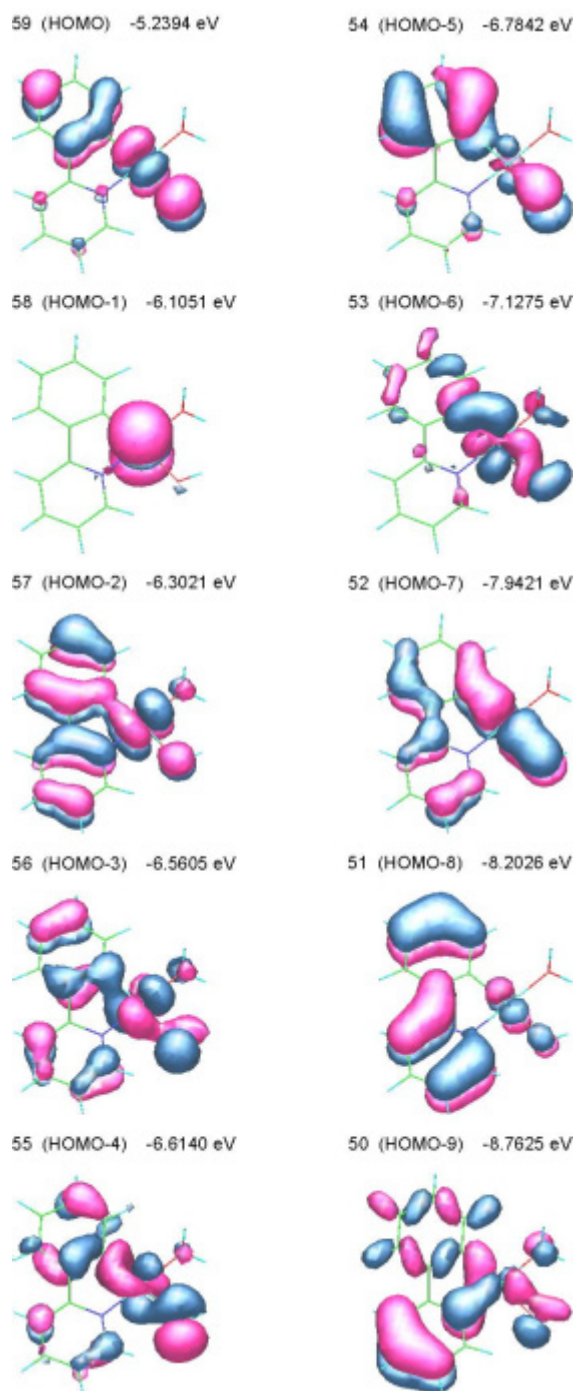

**Fig. S20** Contour plots of the B3LYP/LANL2DZ derived HOMO-9 through HOMO molecular orbitals of **8**, where the structure in aqueous media was computed using the polarizable continuum model (PCM) in Gaussian 03.

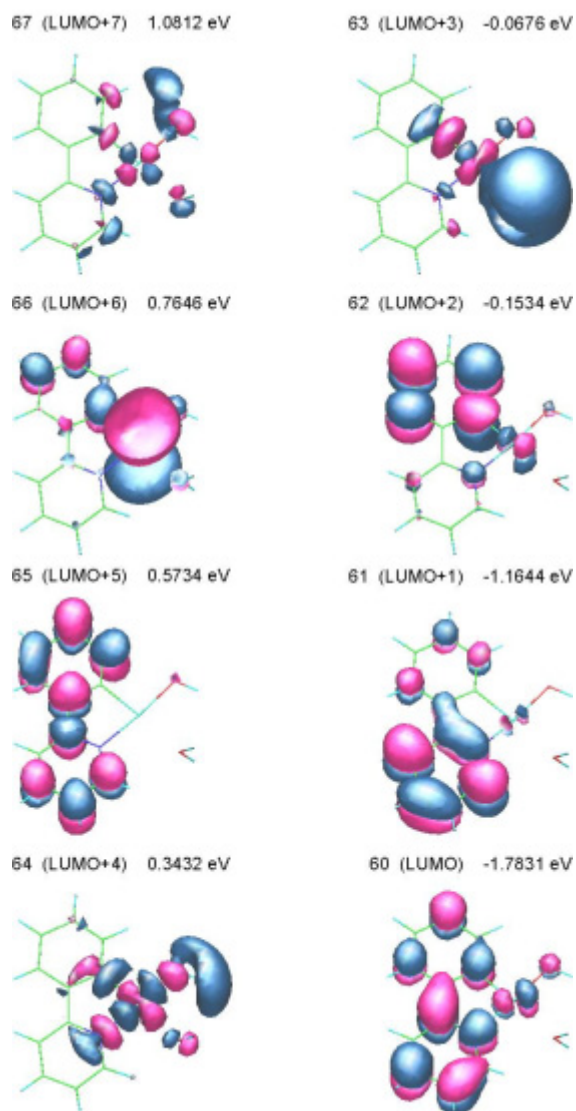

**Fig. S21** Contour plots of the B3LYP/LANL2DZ derived LUMO through LUMO+7 molecular orbitals of **9**, where the structure in aqueous media was computed using the polarizable continuum model (PCM) in Gaussian 03.

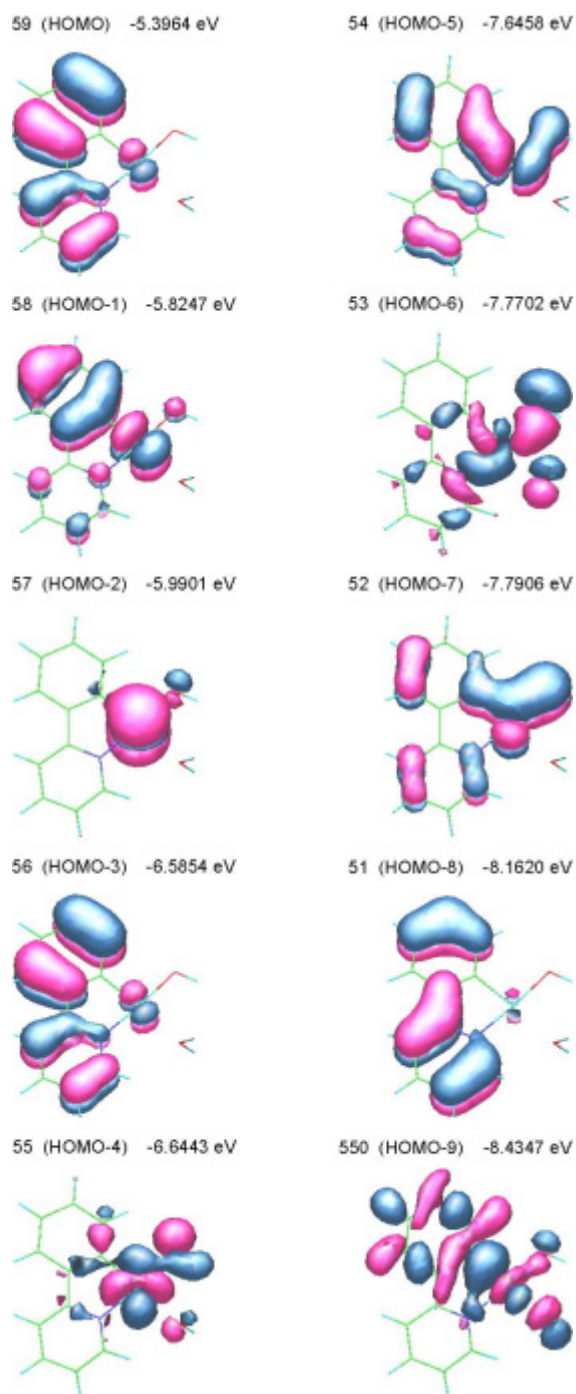

**Fig. S22** Contour plots of the B3LYP/LANL2DZ derived HOMO-9 through HOMO molecular orbitals of **9**, where the structure in aqueous media was computed using the polarizable continuum model (PCM) in Gaussian 03.

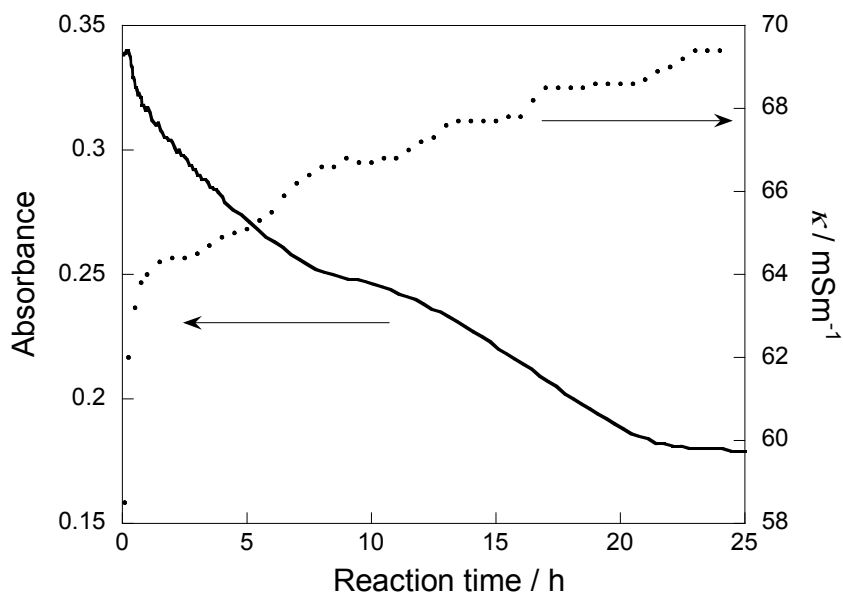

**Fig. S23** Solidline: The time course of the change in absorbance at  $40 \text{ km}^{-1}$  after dissolution of **1** into water ( $1.8 \times 10^{-5} \text{ M}$ ) at  $25 \text{ }^\circ\text{C}$  in air. Dotted line: The time course in the change of electrical conductivity ( $\kappa$ ) after dissolution of **1** into water ( $2.9 \times 10^{-5} \text{ M}$ ) at  $25 \text{ }^\circ\text{C}$  in air. The pH values were measured at the start and the end of the hydrolysis reaction (start (2 min): 5.40, end (24 h): 6.07).

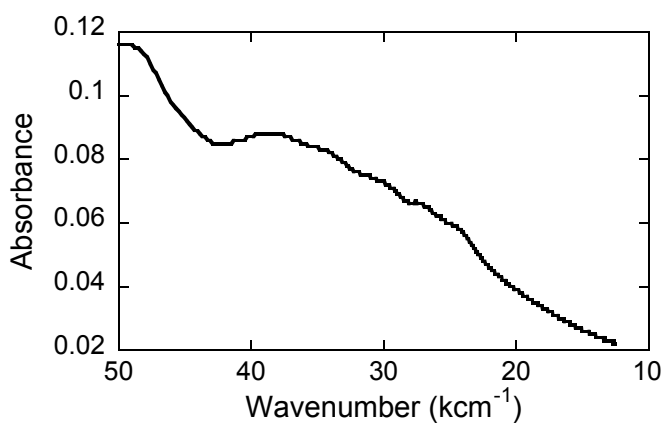

**Fig. S24** The solid-state UV-visible absorption spectrum of  $\text{Pt}_2(\text{ppy})_2(\mu\text{-Cl})_2$  (**4**) observed by the Nujol-Mull method using a liquid paraffin matrix.

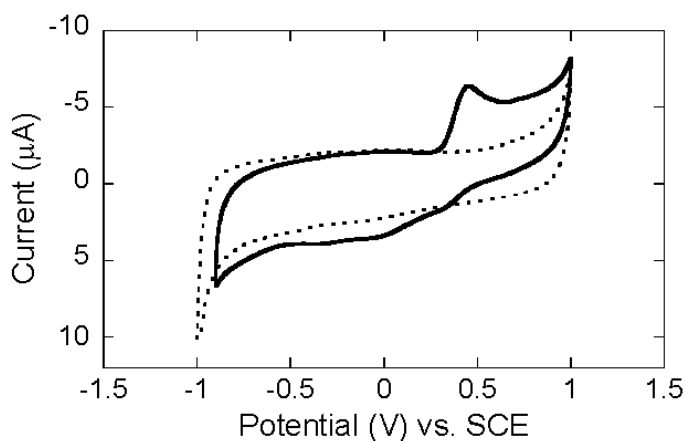

**Fig. S25** The cyclic voltammogram of  $[\text{K}(18\text{-crown-}6)][\text{Pt}(\text{ppy})\text{Cl}_2]\cdot 0.5\text{H}_2\text{O}$  (**1**) in aqueous 1.0 M KCl solution, at 20 °C, recorded at a scan rate of 100 mV/s. The dashed line corresponds to a blank scan in the absence of **1**.

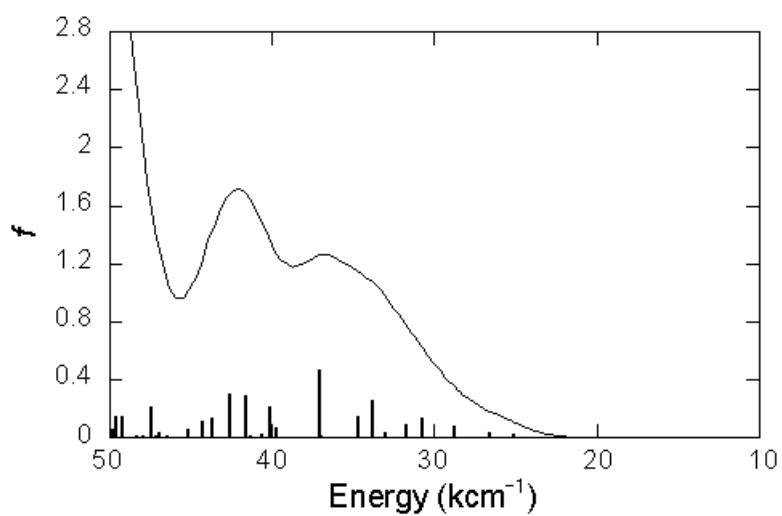

**Fig. S26** The absorption spectrum of  $\text{Pt}_2(\text{ppy})_2(\mu\text{-Cl})_2$  (**4**) in water computed based on the TD-DFT calculations (B3LYP/LanL2DZ) using the PCM method in Gaussian 03. The simulated spectrum roughly coincides with that observed in the solid state (see Fig. S24).
